# Supplementary material for: Aliphatic hyperbranched polyphosphate: a novel multicolor RTP material with AIE character
Source: Royal Society of Chemistry journal article supplement (doi:10.1039/d4ra03099k), 2024-01-01
Supplement: d4ra03099k1.pdf [file d4ra03099k1.pdf]

## Supporting Information for

### Aliphatic Hyperbranched Polyphosphate: a Novel Multicolor RTP Material with AIE Character

Lianlian Wang<sup>a\*</sup>, Hongxia Yan<sup>b</sup>

**Table S1.** The specific data during P1~P3 synthesis.

|                                                     | P1           | P2           | P3           |
|-----------------------------------------------------|--------------|--------------|--------------|
| Reactant A                                          | TEP          | DEP          | DEP          |
| Reactant B                                          | EG           | EG           | GI           |
| A/B(mol/mol)                                        | 1:1.6        | 1:1.2        | 1:0.8        |
| m <sub>A</sub> /g (n <sub>A</sub> /mol)             | 27.32 (0.15) | 22.01 (0.2)  | 22.01 (0.20) |
| m <sub>B</sub> /g (n <sub>B</sub> /mol)             | 14.90 (0.24) | 14.90 (0.24) | 14.73 (0.16) |
| -OCH <sub>2</sub> CH <sub>3</sub> /-OH<br>(mol/mol) | 3:3.2        | 1:1.2        | 1:1.2        |

Where m<sub>A</sub>: the mass of reactant A

n<sub>A</sub>: the amount of substance of reactant A

m<sub>B</sub>: the mass of reactant B

n<sub>B</sub>: the amount of substance of reactant B

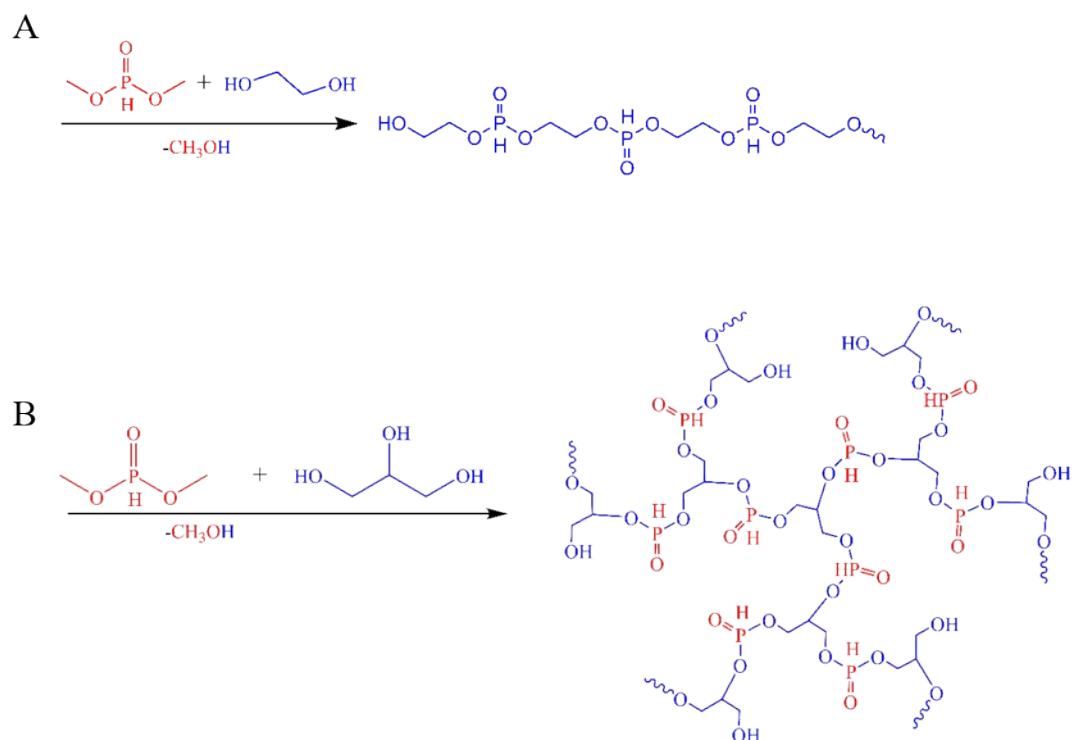

**Scheme S1.** (A) The synthetic route of P2; (C) The synthetic route of P3

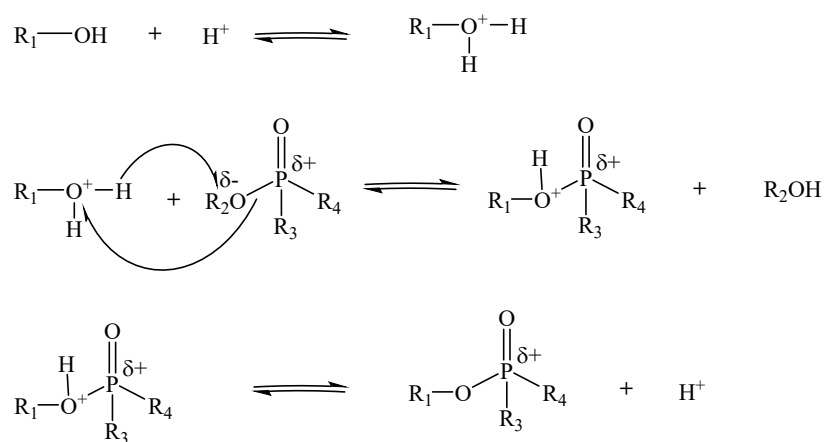

**Scheme S2.** The possible transesterification polymerization reaction mechanism.

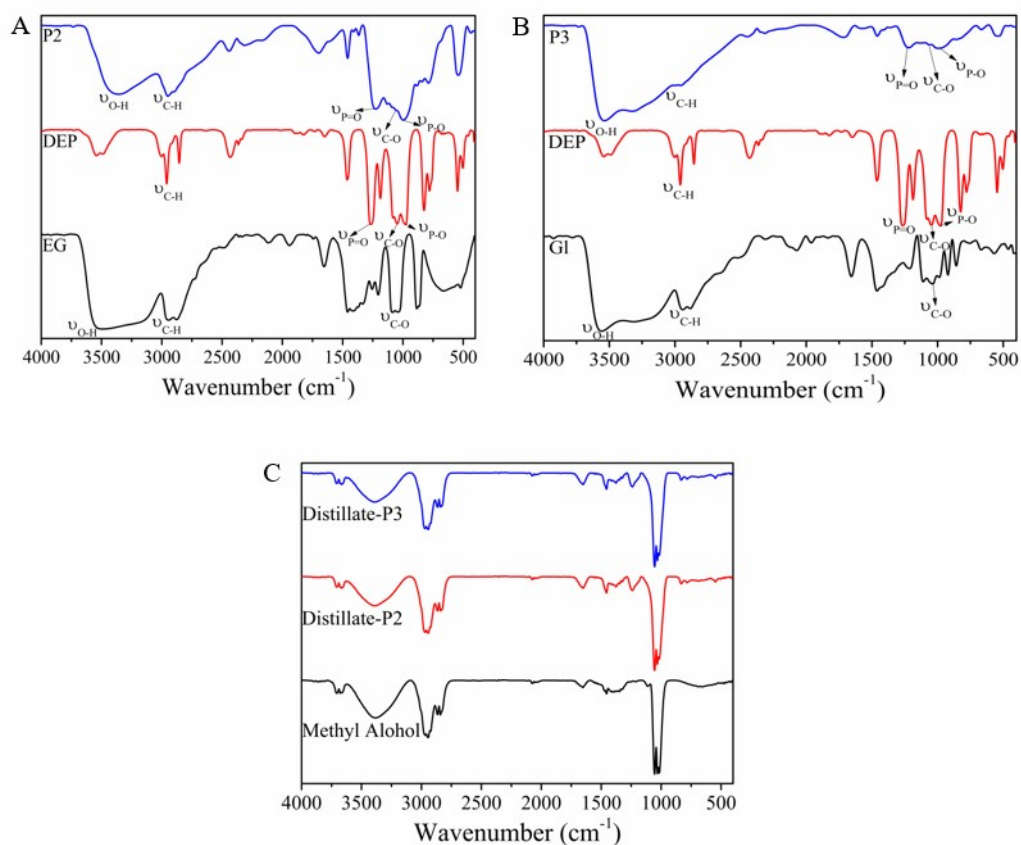

**Figure S1.** (A) FTIR spectra of EG, DEP and P2; (B) FTIR spectra of GI, DEP and P3; (C) FTIR spectra of standard methyl alcohol and distillates during P2 and P3 synthesis process.

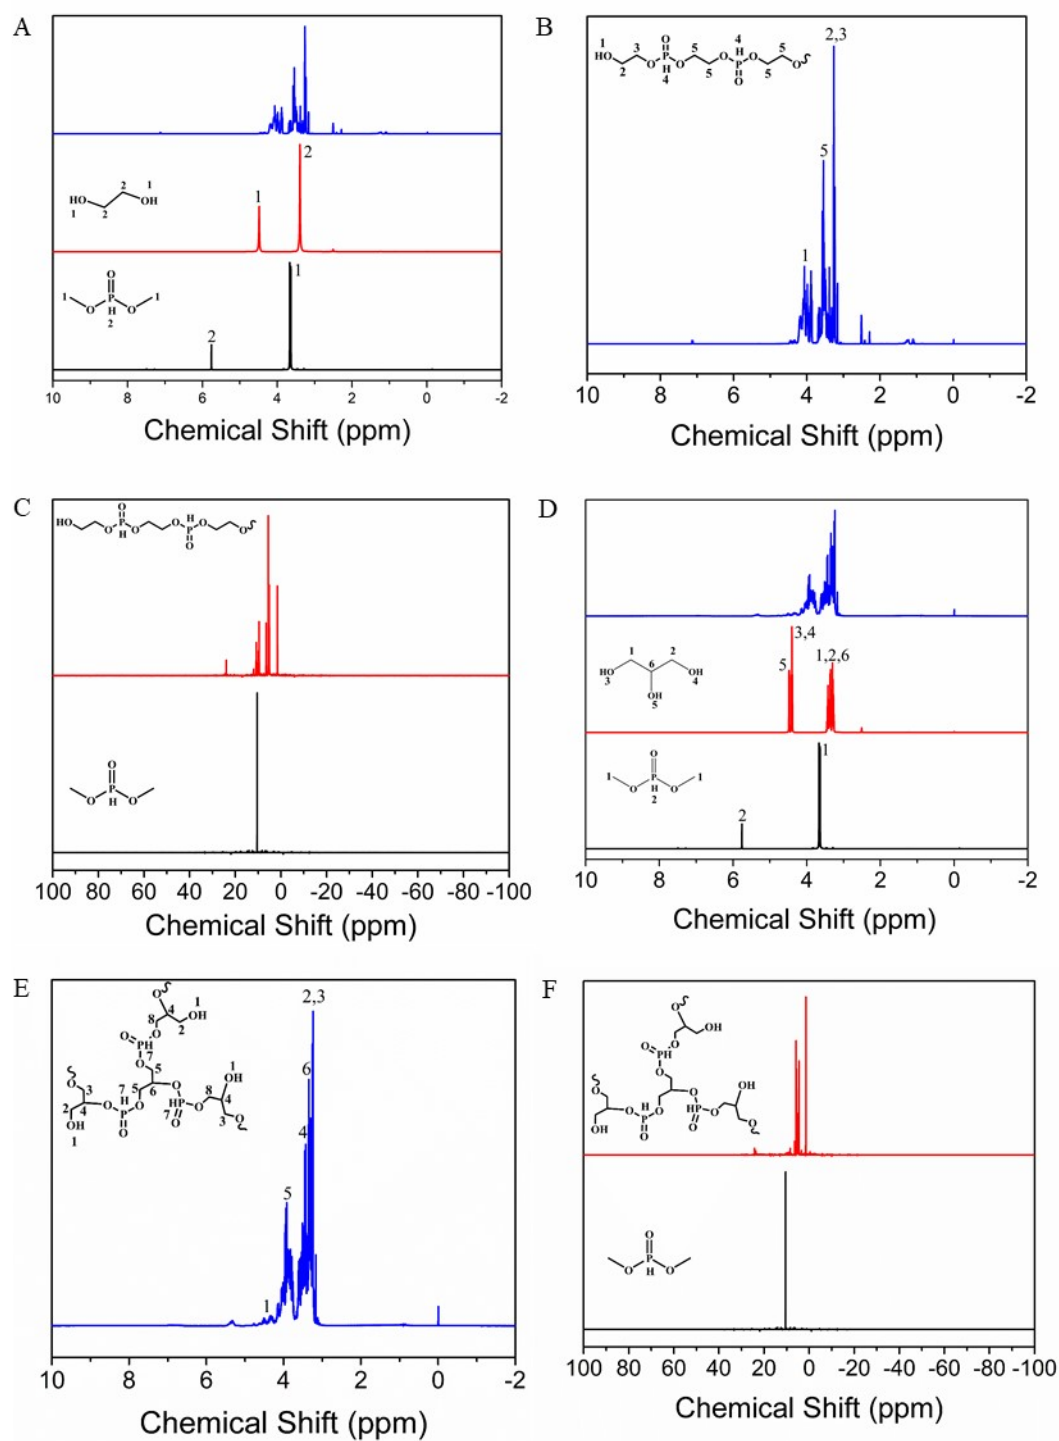

**Figure S2.** (A)  $^1\text{H}$  NMR spectra of DEP, EG and P2; (B)  $^1\text{H}$  NMR spectra of P2; (C)  $^{31}\text{P}$  NMR spectra of DEP and P2; (D)  $^1\text{H}$  NMR spectra of DEP, G1 and P3; (E)  $^1\text{H}$  NMR spectra of P3; (F)  $^{31}\text{P}$  NMR spectra of DEP and P3.

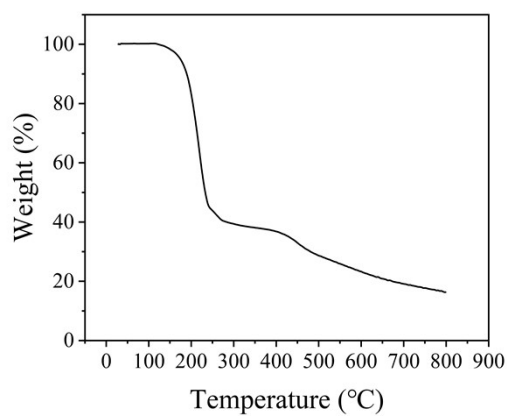

Figure S3. TGA cure of P1

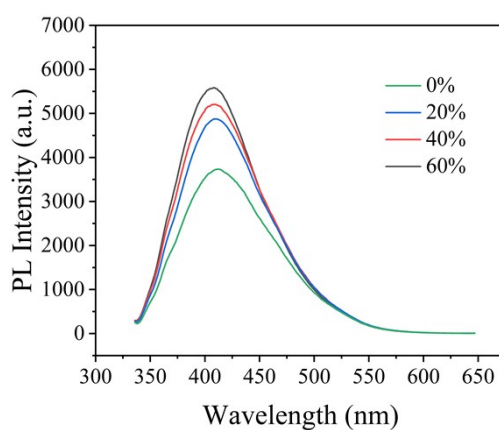

Figure S4. The PL intensity of P1 with different volume ratios of petroleum ether in ethanol / petroleum ether solvent mixtures (50 mg/mL).

Table S2. Stoke shifts of P1 solution under different concentration.

| Concentration/mg·mL <sup>-1</sup> | $\lambda_{ex}/\text{nm}$ | $\lambda_{em}/\text{nm}$ | Stokes shift/nm |
|-----------------------------------|--------------------------|--------------------------|-----------------|
| 10                                | 345                      | 402                      | 57              |
| 15                                | 345                      | 400                      | 55              |
| 20                                | 345                      | 402                      | 57              |
| 30                                | 345                      | 402                      | 57              |
| 40                                | 345                      | 402                      | 57              |
| 50                                | 345                      | 402                      | 57              |

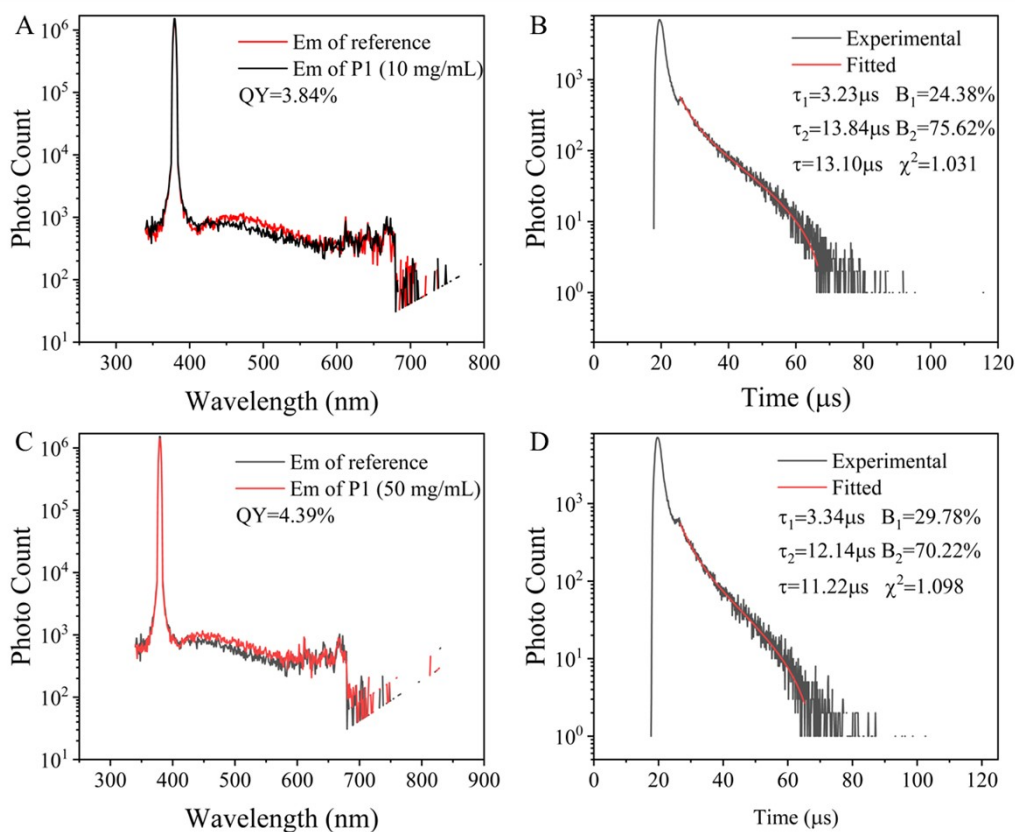

**Figure S5.** (A) Absolute photoluminescence quantum yield of P1 (10 mg/mL); (B) Transient photoluminescence decay curve of P1 (10 mg/mL); (C) Absolute photoluminescence quantum yield of P1 (50 mg/mL); (D) Transient photoluminescence decay curve of P1 (50 mg/mL).

Table S3  $k_r$  and  $k_{nr}$  of P1

| Concentration/ $\text{mg} \cdot \text{mL}^{-1}$ | QY/%  | $\tau/\mu\text{s}$ | $k_r/\times 10^3 \cdot \text{s}^{-1}$ | $k_{nr}/\times 10^4 \cdot \text{s}^{-1}$ |
|-------------------------------------------------|-------|--------------------|---------------------------------------|------------------------------------------|
| 10                                              | 3.84  | 13.10              | 2.93                                  | 7.34                                     |
| 50                                              | 4.39  | 11.22              | 3.91                                  | 8.52                                     |
| Pure state                                      | 22.42 | 12.82              | 17.48                                 | 6.05                                     |

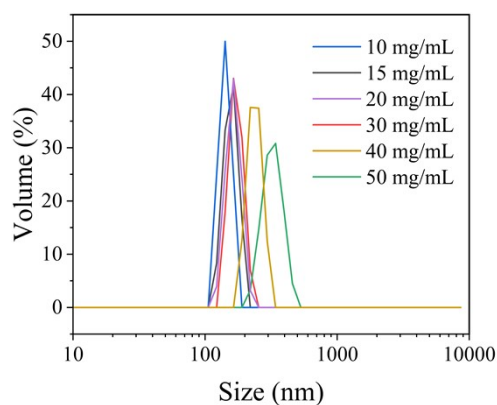

**Figure S6.** Aggregates size distributions of the P1 at different concentration in aqueous solution measured at room temperature.

**Table S4.** DFT calculation results of HOMO-LUMO energy levels of the conformations with 1~4 first generation P1 molecules, 1st~3rd generation P1 with one molecule, 1~4 first generation P3 molecules and 1~3 second generation P3 molecules.

|    | Gnenration<br>number | Molecule<br>number | E<br>(HOMO)<br>(a.u.) | E<br>(LUMO)<br>(a.u.) | Energy<br>gap (a.u.) | Energy<br>gap (eV) |
|----|----------------------|--------------------|-----------------------|-----------------------|----------------------|--------------------|
| P1 | 1                    | 1                  | -0.27636              | 0.04041               | 0.31677              | 8.619755           |
|    |                      | 2                  | -0.2533               | 0.02997               | 0.28327              | 7.708173           |
|    |                      | 3                  | -0.24659              | 0.02251               | 0.2691               | 7.322588           |
|    |                      | 4                  | -0.24334              | 0.01937               | 0.26271              | 7.148707           |
|    | 2                    | 1                  | -0.25754              | 0.01596               | 0.2735               | 7.442318           |
|    | 3                    | 1                  | -0.25124              | 0.01749               | 0.26873              | 7.31252            |
|    | P4                   | 1                  | 1                     | -0.26256              | 0.03748              | 0.30004            |
| 2  |                      |                    | -0.24998              | 0.02477               | 0.27475              | 7.476332           |
| 3  |                      |                    | -0.23629              | 0.03263               | 0.26892              | 7.31769            |
| 4  |                      |                    | -0.24217              | 0.01573               | 0.2579               | 7.01782            |
| 2  |                      | 1                  | -0.2668               | 0.03069               | 0.29749              | 8.095119           |
|    |                      | 2                  | -0.26476              | 0.02628               | 0.29104              | 7.919606           |
|    |                      | 3                  | -0.25444              | 0.01682               | 0.27126              | 7.381364           |

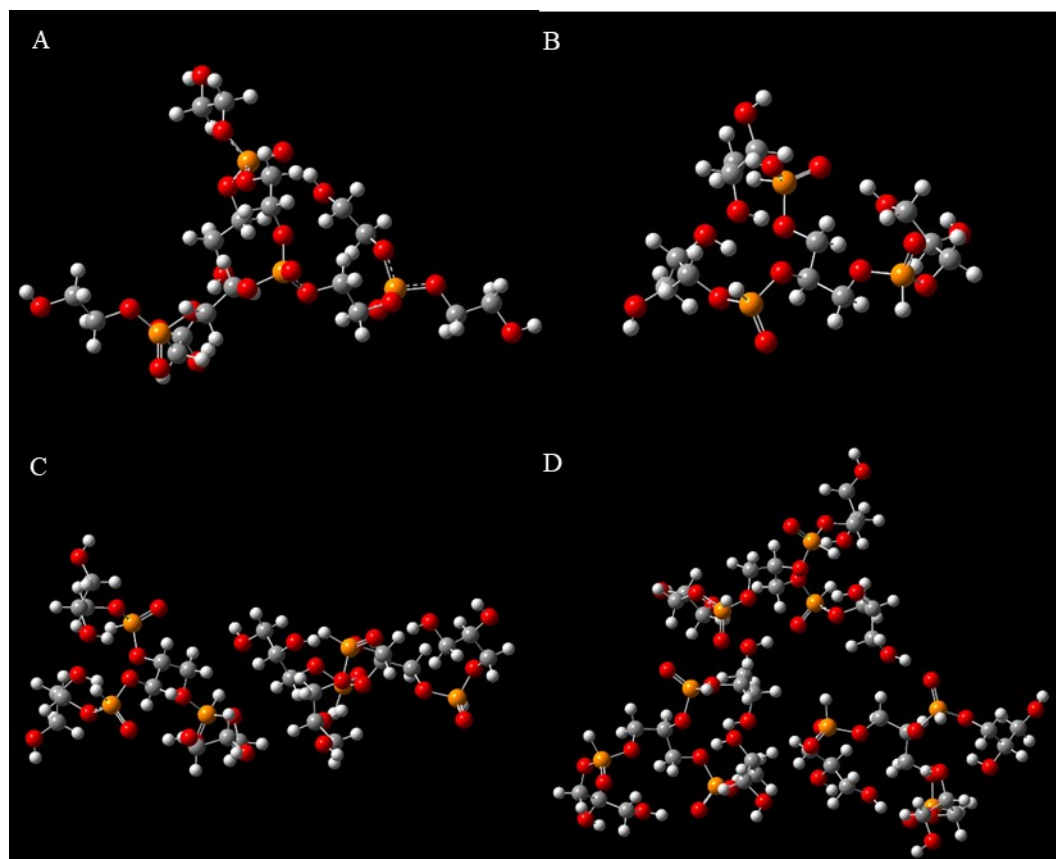

**Figure S7.** Optimized conformations of the second generation P1 with one molecule (A) and the second generation P3 with molecules increasing from 1 to 3 (B~D)

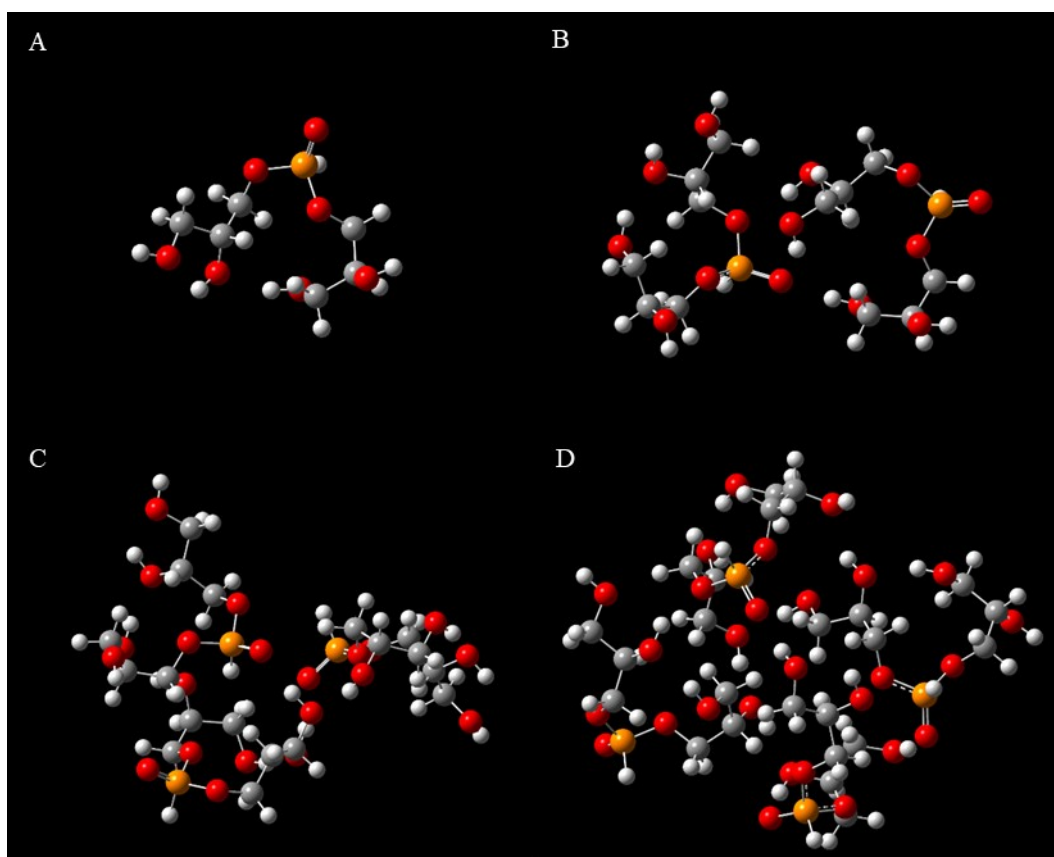

**Figure S8.** Optimized conformations of the first generation P3 with molecules increasing from 1 to 4 (A~D).

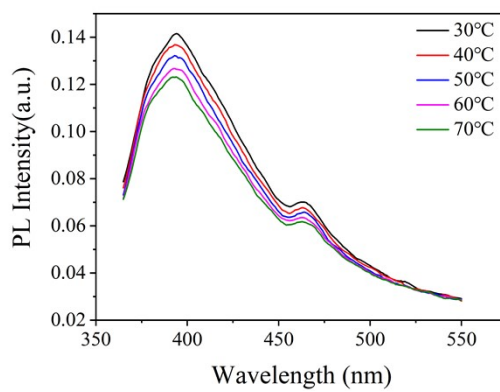

**Figure S9.** The emission spectra of P1 aqueous solution (50 mg/mL) at different temperature.

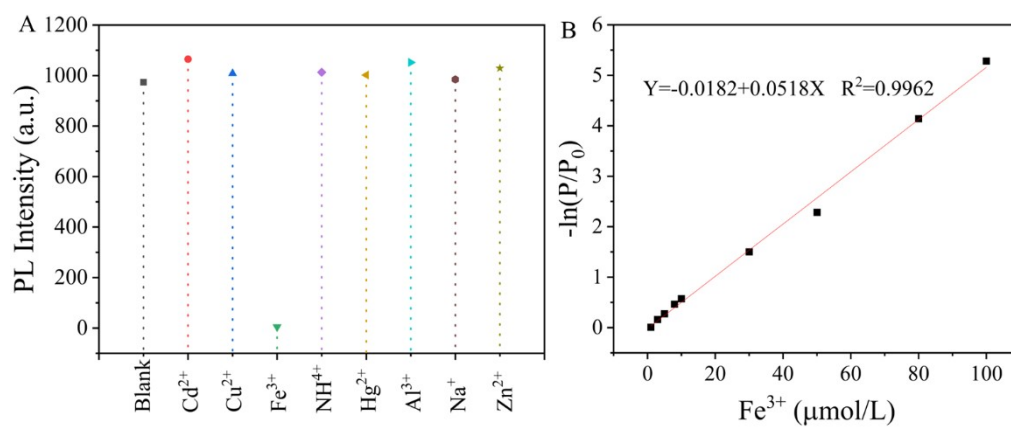

Figure S10. (A) Photoluminescence intensity of P1 (10mg/mL) in the presence of various metal ions ( $10^{-4}$  mol/L) in aqueous; (B) The dependence of  $-\ln(P/P_0)$  on the concentration of Fe<sup>3+</sup> in the range of  $1 \times 10^{-6} \sim 1 \times 10^{-4}$  mol/L
